# Supplementary material for: Hydrophobic paraffin-selective pillared-layer MOFs for olefin purification
Source: Royal Society of Chemistry journal article supplement (doi:10.1039/d2ta06783h), 2022-01-01
Supplement: d2ta06783h1.pdf [file d2ta06783h1.pdf]

# Supplementary Information

## Hydrophobic paraffins-selective pillared-layer MOFs for olefin purification

Sisi Jiang<sup>a,‡</sup>, Jiaqi Li<sup>a,‡</sup>, Meng Feng<sup>a</sup>, Rundao Chen<sup>a</sup>, Lidong Guo<sup>a</sup>,  
Qianqian Xu<sup>a</sup>, Lihang Chen<sup>a,b</sup>, Fuxing Shen<sup>a,b</sup>, Zhiguo Zhang<sup>a,b</sup>, Yiwen Yang<sup>a,b</sup>,  
Qilong Ren<sup>a,b</sup>, Qiwei Yang<sup>a,b,\*</sup>, Zongbi Bao<sup>a,b,\*</sup>

<sup>a</sup>Key Laboratory of Biomass Chemical Engineering of the Ministry of Education,

College of Chemical and Biological Engineering, Zhejiang University,

Hangzhou 310027, China;

<sup>b</sup>Institute of Zhejiang University—Quzhou,

Quzhou 324000, China;

<sup>‡</sup>These authors contributed equally to this work.

\*Corresponding author:

Zongbi Bao ([baozb@zju.edu.cn](mailto:baozb@zju.edu.cn)); Qiwei Yang ([yangqw@zju.edu.cn](mailto:yangqw@zju.edu.cn))

## Table of Contents

**Fig. S1** Optical micrograph of Zn(BTFM)(DABCO)<sub>0.5</sub> and Cu(BTFM)(DABCO)<sub>0.5</sub>.

**Fig. S2** Thermogravimetric analysis curves of Zn(BTFM)(DABCO)<sub>0.5</sub> and Cu(BTFM)(DABCO)<sub>0.5</sub>.

**Fig. S3** N<sub>2</sub> adsorption-desorption isotherms at 77 K of Zn(BTFM)(DABCO)<sub>0.5</sub> and Cu(BTFM)(DABCO)<sub>0.5</sub>.

**Fig. S4** The C<sub>2</sub>H<sub>4</sub>, C<sub>2</sub>H<sub>6</sub>, C<sub>3</sub>H<sub>6</sub> and C<sub>3</sub>H<sub>8</sub> adsorption isotherms of Zn(BTFM)(DABCO)<sub>0.5</sub> and Cu(BTFM)(DABCO)<sub>0.5</sub> at 273 K. The IAST selectivity of C<sub>2</sub>H<sub>6</sub>/C<sub>2</sub>H<sub>4</sub> (50/50, v/v) and C<sub>3</sub>H<sub>8</sub>/C<sub>3</sub>H<sub>6</sub> (50/50, v/v) at 273 and 298 K for Zn(BTFM)(DABCO)<sub>0.5</sub> and Cu(BTFM)(DABCO)<sub>0.5</sub>. The adsorption heats of C<sub>2</sub>H<sub>4</sub>, C<sub>2</sub>H<sub>6</sub>, C<sub>3</sub>H<sub>6</sub> and C<sub>3</sub>H<sub>8</sub> adsorbed onto Cu(BTFM)(DABCO)<sub>0.5</sub>.

**Fig. S5** The experimental breakthrough for (a) C<sub>2</sub>H<sub>6</sub>/C<sub>2</sub>H<sub>4</sub> (10/90, v/v) and (b) C<sub>3</sub>H<sub>8</sub>/C<sub>3</sub>H<sub>6</sub> (10/90, v/v) in a packed column with activated Zn(BTFM)(DABCO)<sub>0.5</sub>. The experimental breakthrough for (c) C<sub>2</sub>H<sub>6</sub>/C<sub>2</sub>H<sub>4</sub> (10/90, v/v) and (d) C<sub>3</sub>H<sub>8</sub>/C<sub>3</sub>H<sub>6</sub> (10/90, v/v) in a packed column with activated Cu(BTFM)(DABCO)<sub>0.5</sub>. Five cycles of breakthrough experiments of (e) Zn(BTFM)(DABCO)<sub>0.5</sub> and (f) Cu(BTFM)(DABCO)<sub>0.5</sub> for the separation of the C<sub>3</sub>H<sub>8</sub>/C<sub>3</sub>H<sub>6</sub> (50/50, v/v) at 298 K and 100 kPa.

**Fig. S6** The experimental and simulated adsorption isotherms of C<sub>2</sub>H<sub>4</sub> and C<sub>2</sub>H<sub>6</sub> as well as C<sub>3</sub>H<sub>6</sub> and C<sub>3</sub>H<sub>8</sub> on Zn(BTFM)(DABCO)<sub>0.5</sub> at 298 K.

**Fig. S7** At 298 K, the density distribution of C<sub>2</sub>H<sub>4</sub>@1 kPa, C<sub>2</sub>H<sub>6</sub>@1 kPa, C<sub>3</sub>H<sub>6</sub>@0.1 kPa and C<sub>3</sub>H<sub>8</sub>@0.1 kPa on Zn(BTFM)(DABCO)<sub>0.5</sub>.

**Fig. S8** Virial equation fitting of adsorption isotherms about C<sub>2</sub>H<sub>4</sub>, C<sub>2</sub>H<sub>6</sub> for Zn(BTFM)(DABCO)<sub>0.5</sub> and C<sub>2</sub>H<sub>4</sub>, C<sub>2</sub>H<sub>6</sub> for Cu(BTFM)(DABCO)<sub>0.5</sub> at 273 and 298 K.

**Fig. S9** Virial equation fitting of adsorption isotherms about C<sub>3</sub>H<sub>6</sub>, C<sub>3</sub>H<sub>8</sub> for Zn(BTFM)(DABCO)<sub>0.5</sub> and C<sub>3</sub>H<sub>6</sub>, C<sub>3</sub>H<sub>8</sub> for Cu(BTFM)(DABCO)<sub>0.5</sub> at 273 and 298 K.

**Fig. S10** Breakthrough curves for C<sub>2</sub>H<sub>6</sub>/C<sub>2</sub>H<sub>4</sub> (10/90, v/v) on (a) Zn(BTFM)(DABCO)<sub>0.5</sub> under humid condition, and (b) Cu(BTFM)(DABCO)<sub>0.5</sub> under humid condition at 298 K.

**Fig. S11** Repeated experiment data of C<sub>3</sub>H<sub>8</sub> adsorption on Cu(BTFM)(DABCO)<sub>0.5</sub> at

298K.

**Table S1** Lennard Jones parameters of C<sub>3</sub>H<sub>6</sub> and C<sub>3</sub>H<sub>8</sub>.

**Table S2** Crystal data and structural refinement.

**Table S3** The fitted parameters of the Virial equation for M(BTFM)(DABCO)<sub>0.5</sub> (M = Zn, Cu).

**Table S4** Summary of the adsorption uptake capacity for C<sub>2</sub>H<sub>6</sub> and C<sub>2</sub>H<sub>4</sub>, uptake ratio for C<sub>2</sub>H<sub>6</sub>/C<sub>2</sub>H<sub>4</sub> at 100 kPa and 298 K, and IAST selectivity at 1kPa and 298K on different C<sub>2</sub>H<sub>6</sub>-selective MOFs.

**Table S5** Summary of the adsorption uptake capacity for C<sub>3</sub>H<sub>8</sub> and C<sub>3</sub>H<sub>6</sub>, uptake ratio for C<sub>3</sub>H<sub>8</sub>/C<sub>3</sub>H<sub>6</sub> at 100 kPa and 298 K, and IAST selectivity at 1kPa and 298K on different C<sub>3</sub>H<sub>8</sub>-selective MOFs.

**Table S6** The calculated energies of framework and gas molecules, as well as the binding energies for Zn(BTFM)(DABCO)<sub>0.5</sub>.

**Table S7** Equation parameters for the single-site Langmuir-Freundlich isotherms model for C<sub>2</sub>H<sub>4</sub> and C<sub>2</sub>H<sub>6</sub> adsorption on M(BTFM)(DABCO)<sub>0.5</sub> (M = Zn, Cu).

**Table S8** Equation parameters for the dual-site Langmuir-Freundlich isotherms model for C<sub>3</sub>H<sub>6</sub> and C<sub>3</sub>H<sub>8</sub> adsorption on M(BTFM)(DABCO)<sub>0.5</sub> (M = Zn, Cu).

## Calculation details

### 1. Single-component adsorption isotherms

Based on the adsorption isotherms of adsorbates tended to be linear, the single component isotherms of C<sub>2</sub>H<sub>4</sub> and C<sub>2</sub>H<sub>6</sub> in M(BTFM)(DABCO)<sub>0.5</sub> (M = Zn, Cu) were fitted with the single-site Langmuir-Freundlich (SSLF) isotherm model<sup>1</sup> (1). While the single component isotherms of C<sub>3</sub>H<sub>6</sub> and C<sub>3</sub>H<sub>8</sub> in M(BTFM)(DABCO)<sub>0.5</sub> (M = Zn, Cu) were steep, dual-site Langmuir-Freundlich (DSLFL) isotherms model<sup>1</sup> (2) was used to fit these isotherms.

$$q = \frac{bp^c}{1 + bp^c} q_{\text{sat}} \quad (1)$$

Here,  $q$  (mmol/g) is the gas uptake amount in adsorbent,  $b$  (kPa<sup>-1</sup>) represents the affinity coefficient of adsorptive site,  $c$  represents the deviations from an ideal homogeneous surface,  $p$  (kPa) is the pressure of the bulk gas at equilibrium with the adsorbed phase and  $q_{\text{sat}}$  (mmol/g) is gas saturation uptake amount. These fitting parameters were provided in the Table S7 with  $R^2 > 0.999$ .

$$q = \frac{b_A p^{c_A}}{1 + b_A p^{c_A}} q_{A\text{sat}} + \frac{b_B p^{c_B}}{1 + b_B p^{c_B}} q_{B\text{sat}} \quad (2)$$

Here,  $q$  (mmol/g) is the gas uptake amount in adsorbent,  $b_A$  and  $b_B$  (kPa<sup>-1</sup>) represent the affinity coefficient of adsorptive site A and B,  $c_A$  and  $c_B$  represent the deviations from an ideal homogeneous surface for adsorptive site A and B,  $p$  (kPa) is the pressure of the bulk gas at equilibrium with the adsorbed phase,  $q_{A\text{sat}}$  and  $q_{B\text{sat}}$  (mmol/g) are gas saturation uptake amount at adsorptive site A and B. These fitting parameters were provided in the Table S8 with  $R^2 > 0.999$ .

### 2. Separation selectivity of C<sub>2</sub>H<sub>6</sub>/C<sub>2</sub>H<sub>4</sub> mixture and C<sub>3</sub>H<sub>8</sub>/C<sub>3</sub>H<sub>6</sub> mixture

The separation selectivities of C<sub>2</sub>H<sub>6</sub>/C<sub>2</sub>H<sub>4</sub> mixture and C<sub>3</sub>H<sub>8</sub>/C<sub>3</sub>H<sub>6</sub> mixture were calculated with the equation originated from the ideal adsorbed solution theory (IAST).<sup>2</sup>

$$S_{i,j} = \frac{q_i/q_j}{p_i/p_j} \quad (3)$$

Where,  $S_{i,j}$  is the selectivity,  $q_i$  and  $q_j$  are the uptake amount of adsorbates onto the adsorbent in equilibrium with the bulk gas. And  $p_i$ ,  $p_j$  are partial pressure of adsorbates.

### 3. The isosteric heat of adsorption ( $Q_{st}$ )

The isosteric heat of adsorption ( $Q_{st}$ ) for  $C_2H_4$ ,  $C_2H_6$ ,  $C_3H_6$  and  $C_3H_8$  of  $M(BTFM)(DABCO)_{0.5}$  ( $M = Zn, Cu$ ) were calculated by means of the adsorption isotherms measured at 273 and 298 K with the Virial-type equation.<sup>3</sup>

$$\ln p = \ln n + \frac{1}{T} \sum_{i=0}^x a_i n^i + \sum_{i=0}^y b_i n^i \quad (4)$$

$$Q_{st} = -R \sum_{i=0}^x a_i n^i \quad (5)$$

Where,  $p$  (mmHg) is the pressure,  $n$  (mg/g) is the gas uptake amount,  $T$  (K) is the temperature,  $a_i$  and  $b_i$  are the Virial coefficients,  $x$  and  $y$  are the numbers of coefficients utilized for describing the isotherms,  $R$  represents the universal gas constant, and  $Q_{st}$  (kJ/mol) is the isosteric heat of adsorption which is independent of the coverage of the adsorbate. The corresponding fitted parameters of the Virial equation for  $M(BTFM)(DABCO)_{0.5}$  ( $M = Zn, Cu$ ) were exhibited in the Table S3.

(a)

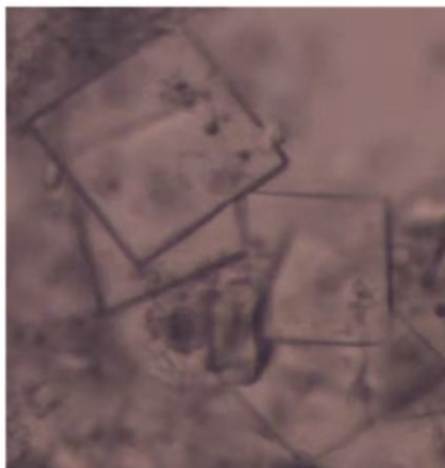

(b)

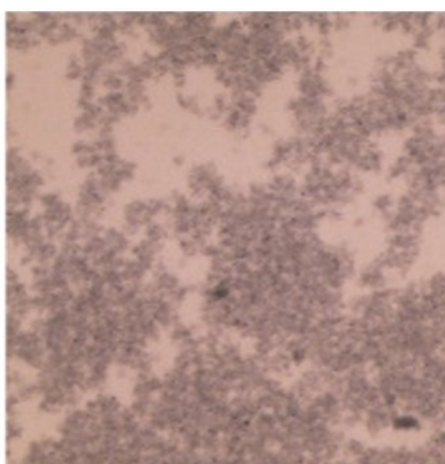

**Fig. S1** Optical micrograph of (a)  $\text{Zn}(\text{BTFM})(\text{DABCO})_{0.5}$  and (b)  $\text{Cu}(\text{BTFM})(\text{DABCO})_{0.5}$ .

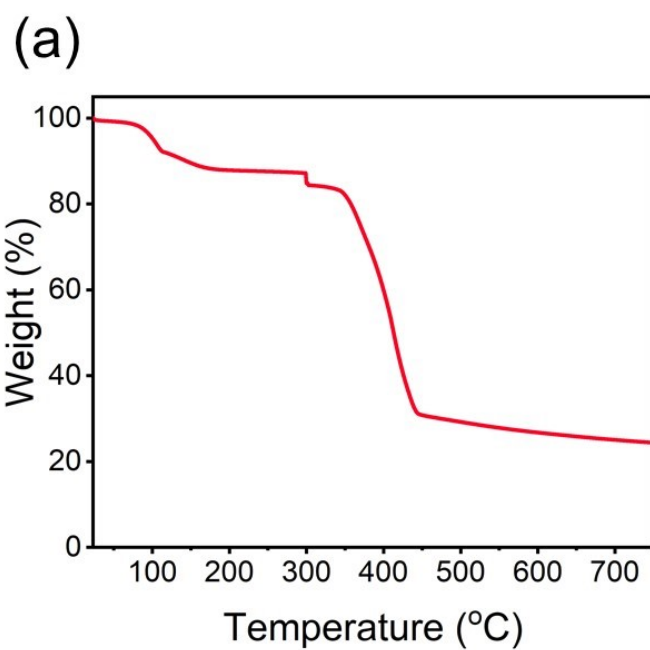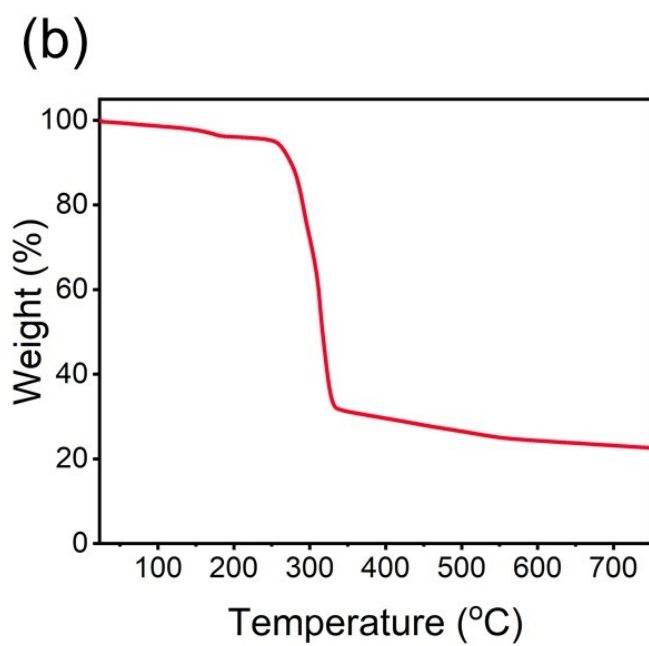

**Fig. S2** Thermogravimetric analysis curves of (a) Zn(BTFM)(DABCO)<sub>0.5</sub> and (b) Cu(BTFM)(DABCO)<sub>0.5</sub>.

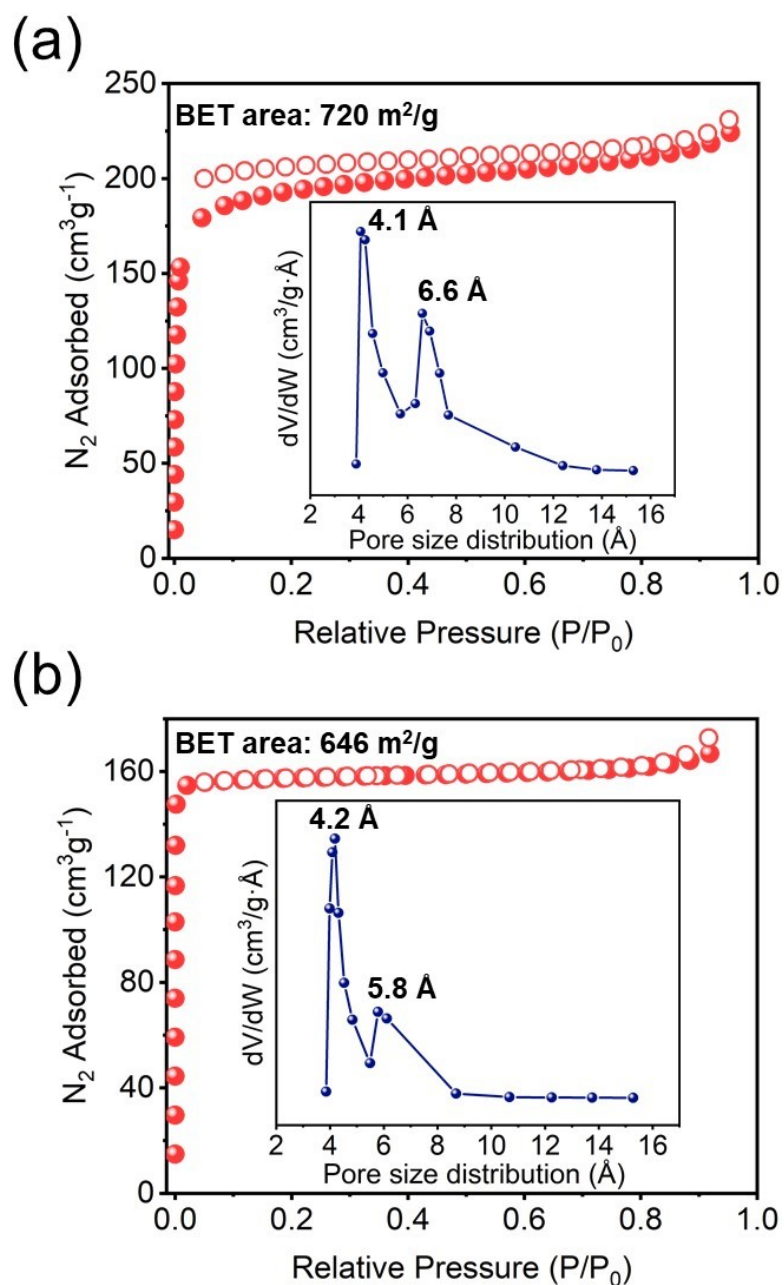

**Fig. S3** N<sub>2</sub> adsorption-desorption isotherms at 77 K of (a) Zn(BTFM)(DABCO)<sub>0.5</sub> and (b) Cu(BTFM)(DABCO)<sub>0.5</sub>. Empty symbols represent N<sub>2</sub> desorption value and inset shows the pore size distribution.



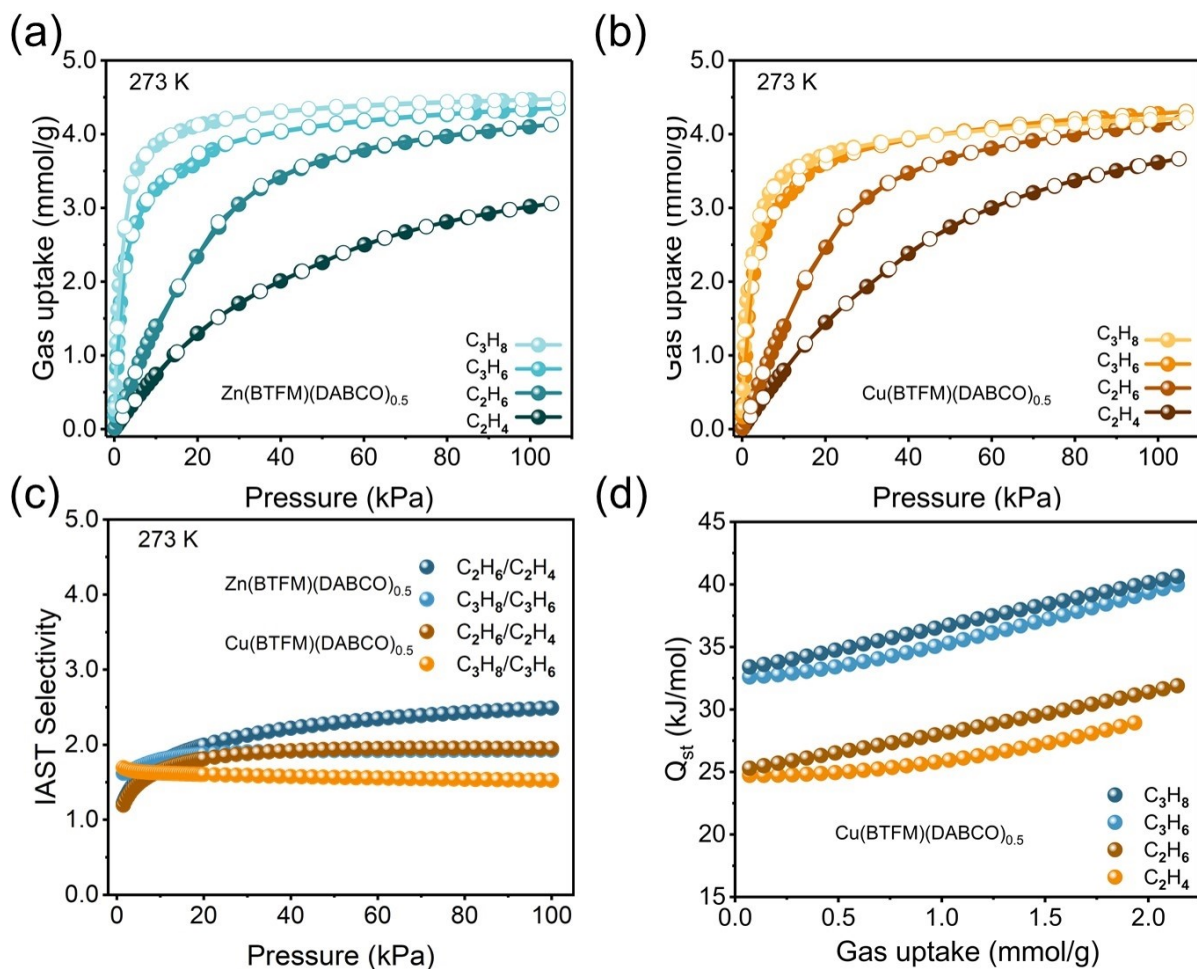

**Fig. S4** The C<sub>2</sub>H<sub>4</sub>, C<sub>2</sub>H<sub>6</sub>, C<sub>3</sub>H<sub>6</sub> and C<sub>3</sub>H<sub>8</sub> adsorption isotherms of (a) Zn(BTFM)(DABCO)<sub>0.5</sub> and (b) Cu(BTFM)(DABCO)<sub>0.5</sub> at 273 K. (c) The IAST selectivity of C<sub>2</sub>H<sub>6</sub>/C<sub>2</sub>H<sub>4</sub> (50/50, v/v) and C<sub>3</sub>H<sub>8</sub>/C<sub>3</sub>H<sub>6</sub> (50/50, v/v) at 273 and 298 K for Zn(BTFM)(DABCO)<sub>0.5</sub> and Cu(BTFM)(DABCO)<sub>0.5</sub>. (d) The adsorption heats of C<sub>2</sub>H<sub>4</sub>, C<sub>2</sub>H<sub>6</sub>, C<sub>3</sub>H<sub>6</sub> and C<sub>3</sub>H<sub>8</sub> adsorbed onto Cu(BTFM)(DABCO)<sub>0.5</sub>.

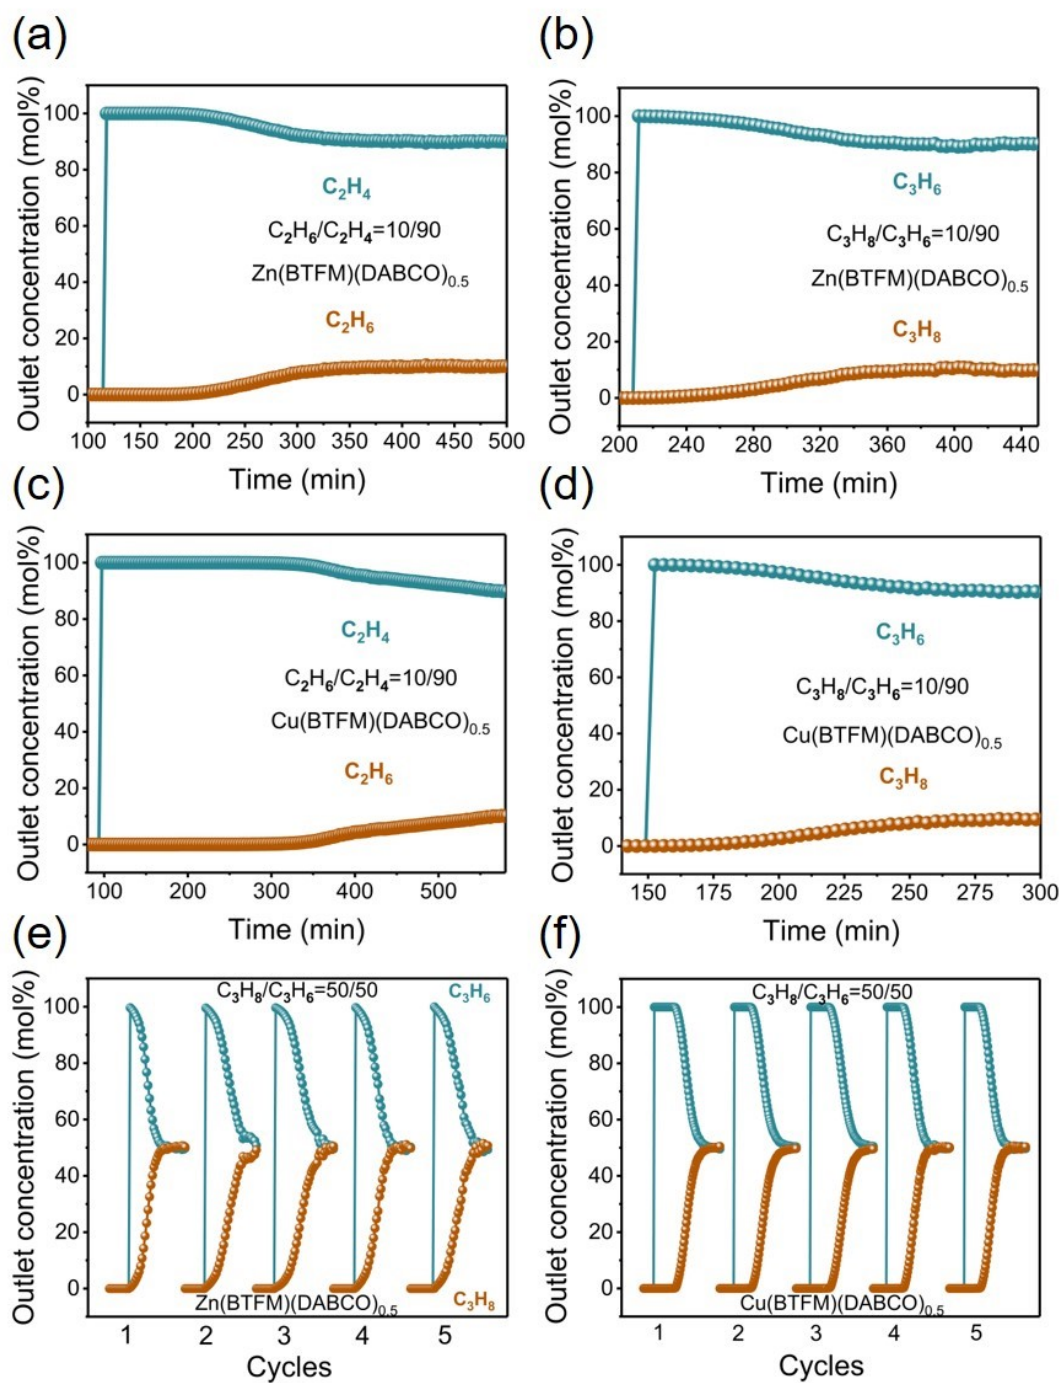

**Fig. S5** The experimental breakthrough for (a) C<sub>2</sub>H<sub>6</sub>/C<sub>2</sub>H<sub>4</sub> (10/90, v/v) and (b) C<sub>3</sub>H<sub>8</sub>/C<sub>3</sub>H<sub>6</sub> (10/90, v/v) in a packed column with activated Zn(BTFM)(DABCO)<sub>0.5</sub>. The experimental breakthrough for (c) C<sub>2</sub>H<sub>6</sub>/C<sub>2</sub>H<sub>4</sub> (10/90, v/v) and (d) C<sub>3</sub>H<sub>8</sub>/C<sub>3</sub>H<sub>6</sub> (10/90, v/v) in a packed column with activated Cu(BTFM)(DABCO)<sub>0.5</sub>. Five cycles of breakthrough experiments of (e) Zn(BTFM)(DABCO)<sub>0.5</sub> and (f) Cu(BTFM)(DABCO)<sub>0.5</sub> for the separation of the C<sub>3</sub>H<sub>8</sub>/C<sub>3</sub>H<sub>6</sub> (50/50, v/v) at 298 K and 100 kPa.

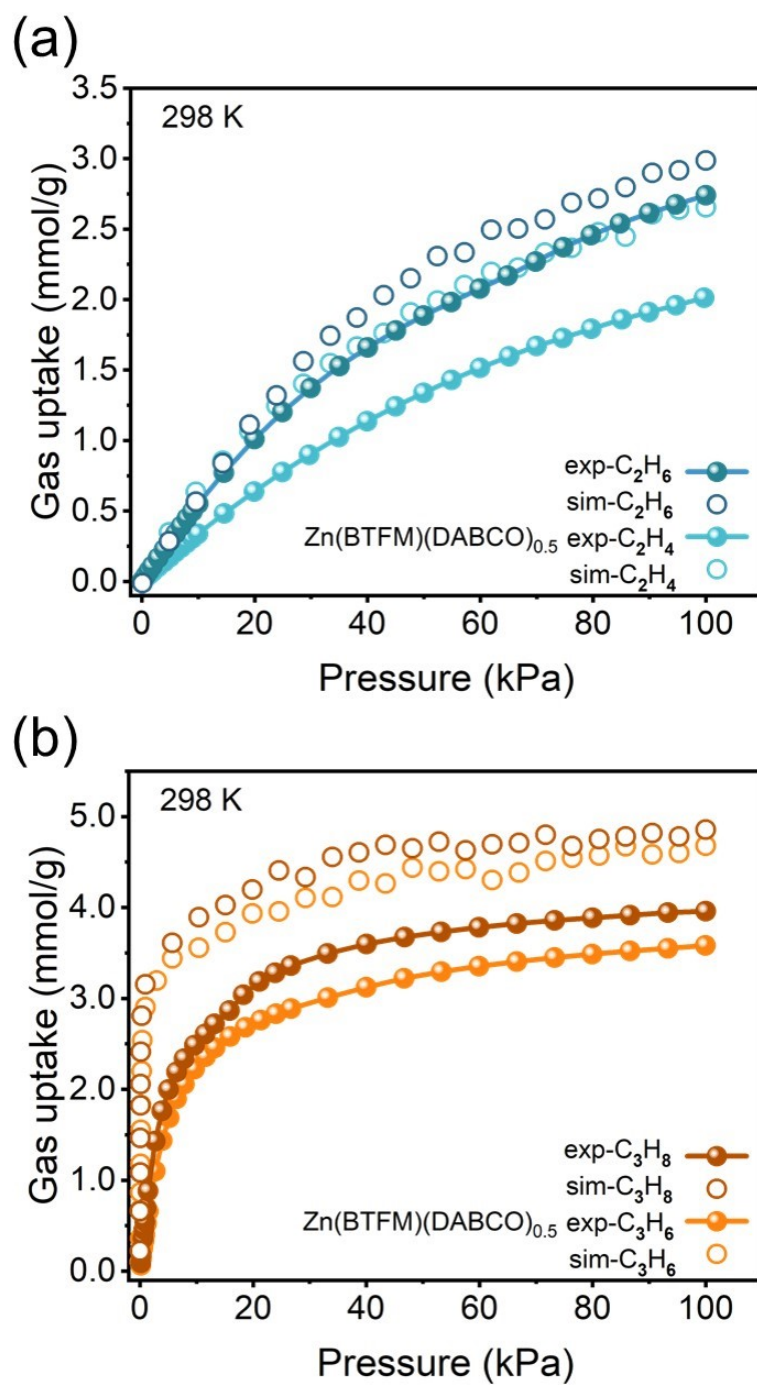

**Fig. S6** The experimental and simulated adsorption isotherms of (a) C<sub>2</sub>H<sub>4</sub> and C<sub>2</sub>H<sub>6</sub> as well as (b) C<sub>3</sub>H<sub>6</sub> and C<sub>3</sub>H<sub>8</sub> on Zn(BTFM)(DABCO)<sub>0.5</sub> at 298 K.

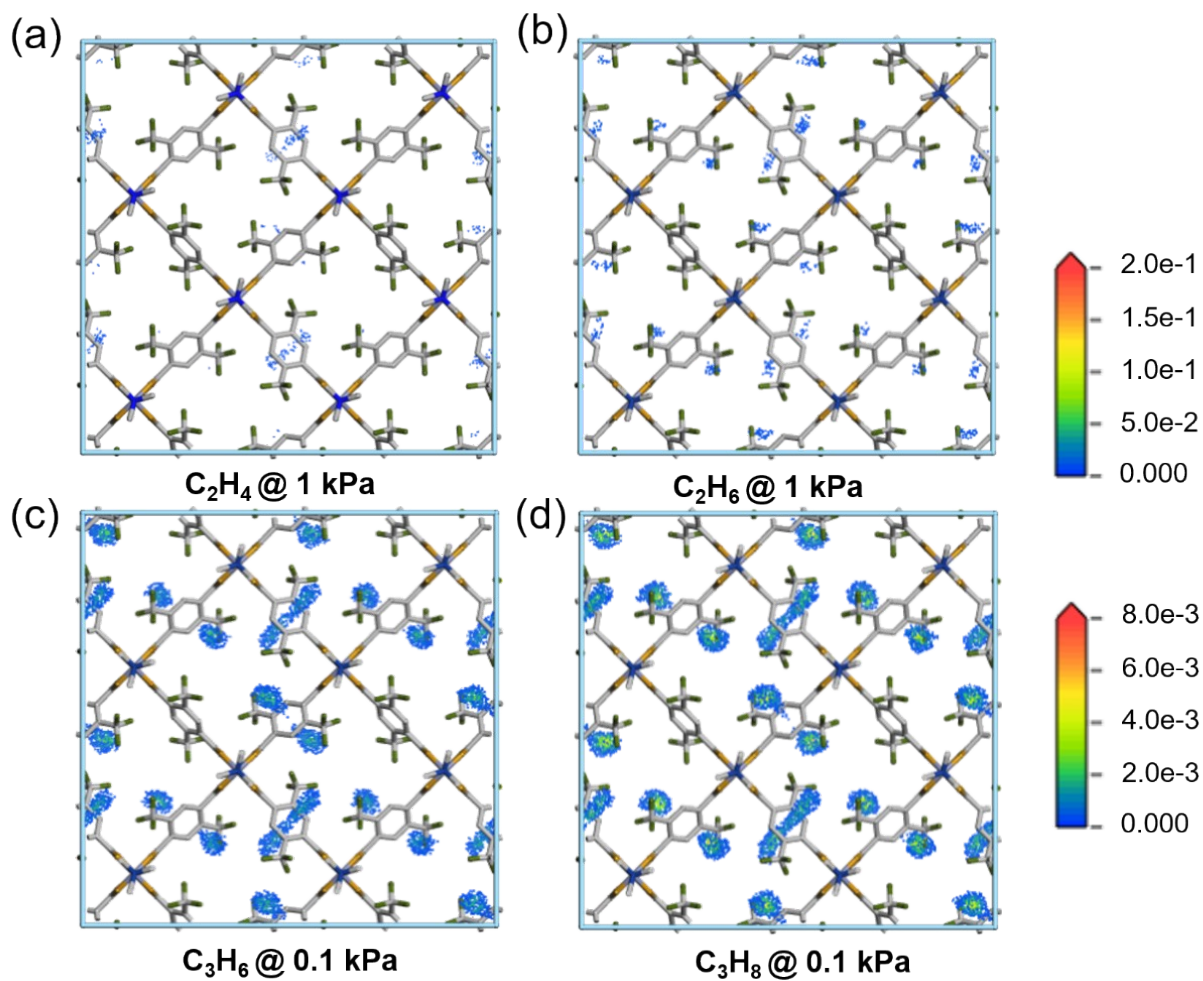

**Fig. S7** At 298 K, the density distribution of (a)  $C_2H_4 @ 1 \text{ kPa}$  (b)  $C_2H_6 @ 1 \text{ kPa}$  (c)  $C_3H_6 @ 0.1 \text{ kPa}$  (d)  $C_3H_8 @ 0.1 \text{ kPa}$  on  $Zn(BTFM)(DABCO)_{0.5}$ . Zn purple, C silvery white, O yellow, F green, respectively. H is omitted for clarity.

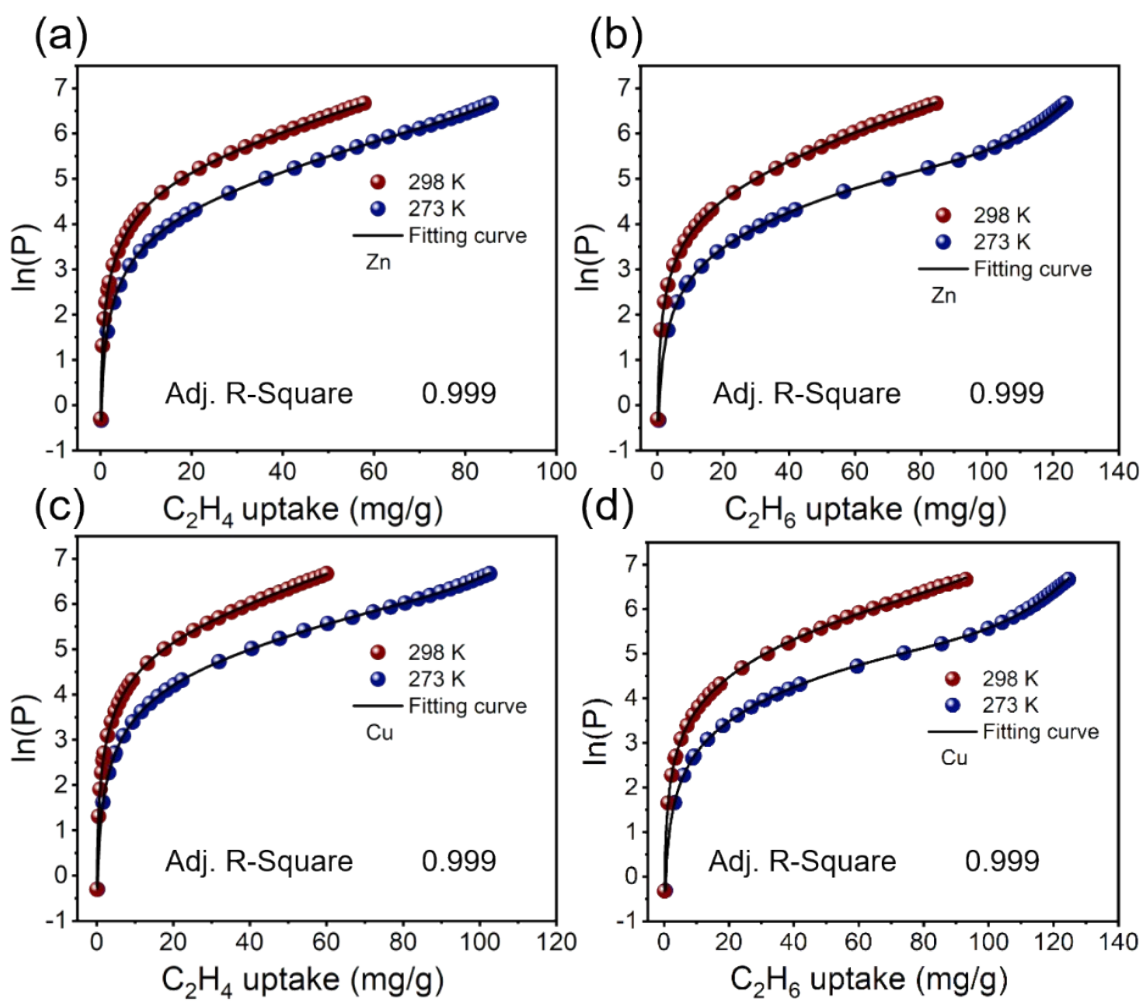

**Fig. S8** Virial equation fitting of adsorption isotherms about (a)  $C_2H_4$ , (b)  $C_2H_6$  for  $Zn(BTFM)(DABCO)_{0.5}$  and (c)  $C_2H_4$ , (d)  $C_2H_6$  for  $Cu(BTFM)(DABCO)_{0.5}$  at 273 and 298 K.



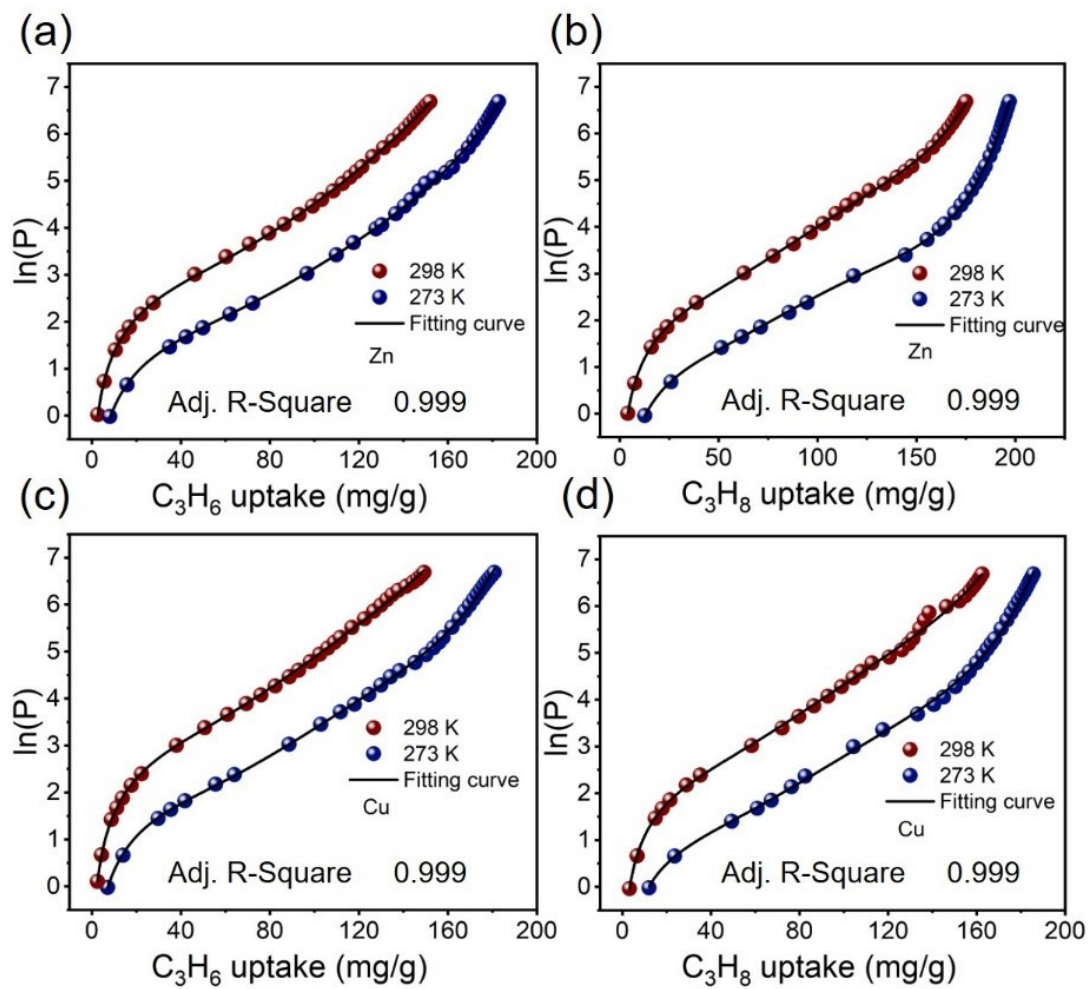

**Fig. S9** Virial equation fitting of adsorption isotherms about (a)  $C_3H_6$ , (b)  $C_3H_8$  for Zn(BTFM)(DABCO)<sub>0.5</sub> and (c)  $C_3H_6$ , (d)  $C_3H_8$  for Cu(BTFM)(DABCO)<sub>0.5</sub> at 273 and 298 K.

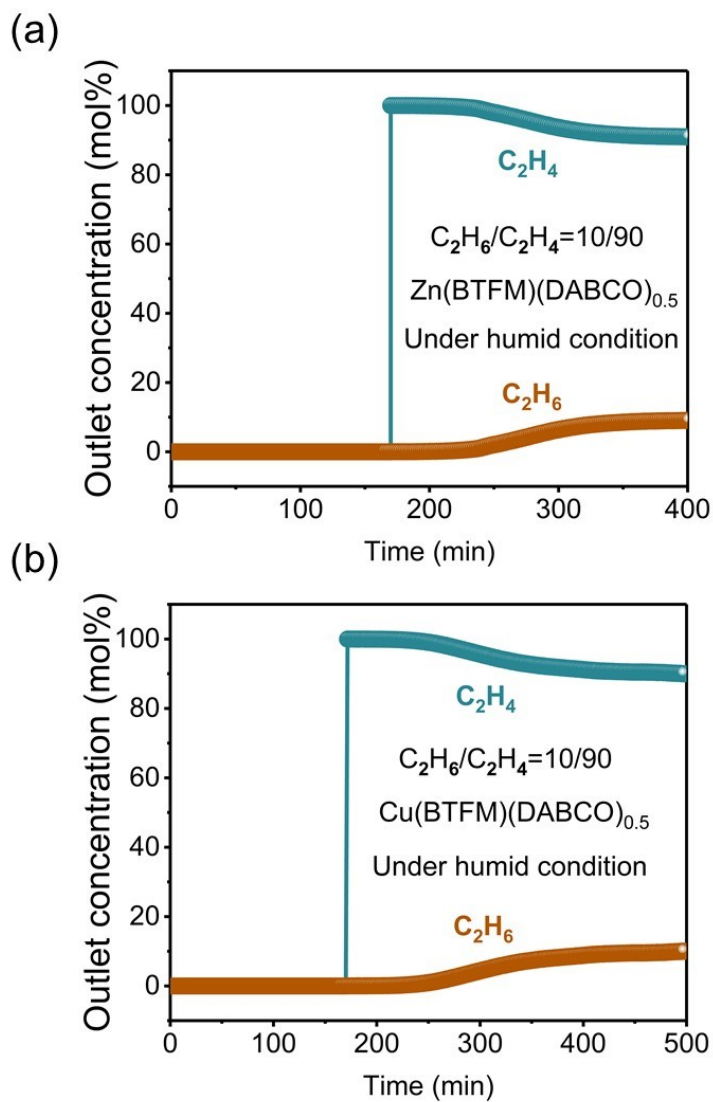

**Fig. S10** Breakthrough curves for  $C_2H_6/C_2H_4$  (10/90, v/v) on (a)  $Zn(BTFM)(DABCO)_{0.5}$  under humid condition and (b)  $Cu(BTFM)(DABCO)_{0.5}$  under humid condition at 298 K. The humid condition comes from 10°C pure water bubbled by  $C_2H_6/C_2H_4$  (10/90, v/v) gas at a rate of 3 mL/min (49.1% RH, 7530ppm).

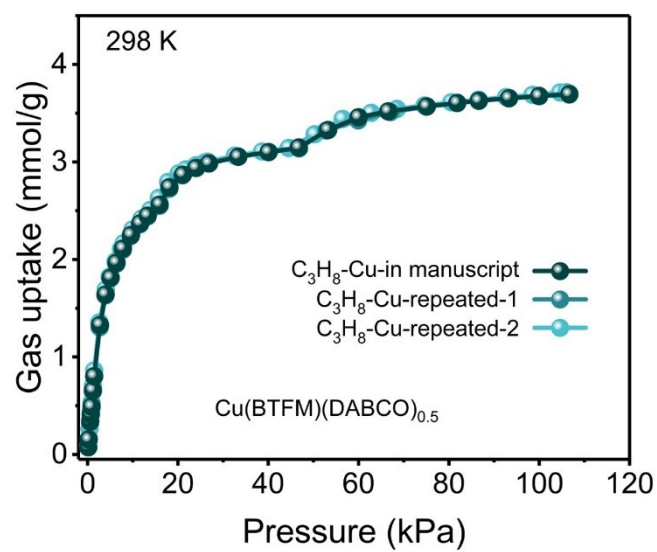

**Fig. S11** Repeated experiment data of  $\text{C}_3\text{H}_8$  adsorption on  $\text{Cu}(\text{BTFM})(\text{DABCO})_{0.5}$  at 298K.



**Table S1** Lennard Jones parameters of C<sub>3</sub>H<sub>6</sub> and C<sub>3</sub>H<sub>8</sub>.

|            |                               | Atoms            | $\sigma$ (Å) | $\epsilon/k_B$ (K) |
|------------|-------------------------------|------------------|--------------|--------------------|
| Adsorbates | C <sub>3</sub> H <sub>6</sub> | -CH              | 3.915        | 81.89              |
|            |                               | -CH <sub>2</sub> | 3.905        | 89.93              |
|            |                               | -CH <sub>3</sub> | 3.915        | 47.66              |
|            | C <sub>3</sub> H <sub>8</sub> | -CH <sub>2</sub> | 3.905        | 59.4               |
|            |                               | -CH <sub>3</sub> | 3.905        | 88.1               |

**Table S2** Crystal data and structural refinement.

| Crystal                             | Zn(BTFM)(DA<br>BCO) <sub>0.5</sub>                                                               | C <sub>2</sub> H <sub>4</sub> @Zn(BTF<br>M)(DABCO) <sub>0.5</sub>                                | C <sub>2</sub> H <sub>6</sub> @Zn(BTF<br>M)(DABCO) <sub>0.5</sub>                               | C <sub>3</sub> H <sub>6</sub> @Zn(BTF<br>M)(DABCO) <sub>0.5</sub>    | C <sub>3</sub> H <sub>8</sub> @Zn(BTF<br>M)(DABCO) <sub>0.5</sub>                                    |
|-------------------------------------|--------------------------------------------------------------------------------------------------|--------------------------------------------------------------------------------------------------|-------------------------------------------------------------------------------------------------|----------------------------------------------------------------------|------------------------------------------------------------------------------------------------------|
| Formula                             | C <sub>26</sub> H <sub>16</sub> F <sub>12</sub> N <sub>2</sub> O<br><sub>8</sub> Zn <sub>2</sub> | C <sub>28</sub> H <sub>20</sub> F <sub>12</sub> N <sub>2</sub> O<br><sub>8</sub> Zn <sub>2</sub> | C <sub>25</sub> H <sub>3</sub> F <sub>12</sub> N <sub>2</sub> O <sub>8</sub><br>Zn <sub>2</sub> | C <sub>14</sub> H <sub>10</sub> F <sub>6</sub> NO <sub>4</sub><br>Zn | C <sub>31.4</sub> H <sub>30.4</sub> F <sub>12</sub> N<br><sub>2</sub> O <sub>8</sub> Zn <sub>2</sub> |
| Molecular<br>weight<br>(g/mol)      | 843.15                                                                                           | 871.24                                                                                           | 814.39                                                                                          | 435.6                                                                | 922.52                                                                                               |
| Space<br>group                      | <i>P4/n</i>                                                                                      | <i>P4/m</i>                                                                                      | <i>P4/m</i>                                                                                     | <i>P4/mcc</i>                                                        | <i>P4/n</i>                                                                                          |
| <i>a</i> (Å)                        | 15.4464 (11)                                                                                     | 10.958 (2)                                                                                       | 10.907 (3)                                                                                      | 10.9098 (9)                                                          | 15.4517 (9)                                                                                          |
| <i>b</i> (Å)                        | 15.4464 (11)                                                                                     | 10.958 (2)                                                                                       | 10.907 (3)                                                                                      | 10.9098 (9)                                                          | 15.4517 (9)                                                                                          |
| <i>c</i> (Å)                        | 9.6932 (10)                                                                                      | 9.685 (3)                                                                                        | 9.688 (3)                                                                                       | 19.2797 (17)                                                         | 9.6409 (5)                                                                                           |
| $\alpha$ (°)                        | 90                                                                                               | 90                                                                                               | 90                                                                                              | 90                                                                   | 90                                                                                                   |
| $\beta$ (°)                         | 90                                                                                               | 90                                                                                               | 90                                                                                              | 90                                                                   | 90                                                                                                   |
| $\gamma$ (°)                        | 90                                                                                               | 90                                                                                               | 90                                                                                              | 90                                                                   | 90                                                                                                   |
| <i>h, k, l</i>                      | 20, 20, 12                                                                                       | 12, 12, 11                                                                                       | 13, 13, 11                                                                                      | 12, 14, 24                                                           | 18, 18, 11                                                                                           |
| Cell<br>volume<br>(Å <sup>3</sup> ) | 2312.7 (4)                                                                                       | 1163.0 (6)                                                                                       | 1152.5 (7)                                                                                      | 2312.7 (4)                                                           | 2301.8 (3)                                                                                           |
| Z                                   | 2                                                                                                | 1                                                                                                | 1                                                                                               | 4                                                                    | 2                                                                                                    |
| Density<br>(g/cm <sup>3</sup> )     | 1.211                                                                                            | 1.244                                                                                            | 1.173                                                                                           | 1.261                                                                | 1.331                                                                                                |



**Table S4** Summary of the uptake capacity for C<sub>2</sub>H<sub>6</sub> and C<sub>2</sub>H<sub>4</sub>, uptake ratio for C<sub>2</sub>H<sub>6</sub>/C<sub>2</sub>H<sub>4</sub> at 100 kPa and 298 K, and IAST selectivity at 1kPa and 298K on C<sub>2</sub>H<sub>6</sub>-selective MOFs.

| MOFs                                   | C <sub>2</sub> H <sub>6</sub><br>(mmol/g) | C <sub>2</sub> H <sub>4</sub><br>(mmol/g) | Uptake ratio<br>(nC <sub>2</sub> H <sub>6</sub> /nC <sub>2</sub> H <sub>4</sub> ) | IAST<br>selectivity<br>at 1kPa | Ref.             |
|----------------------------------------|-------------------------------------------|-------------------------------------------|-----------------------------------------------------------------------------------|--------------------------------|------------------|
| UiO-66-CF <sub>3</sub>                 | 0.8703                                    | 0.4831                                    | 1.801                                                                             | 2.6                            | 4                |
| ZIF-7                                  | 1.888                                     | 1.818                                     | 1.038                                                                             | -                              | 5                |
| ZIF-8                                  | 2.505                                     | 1.429                                     | 1.753                                                                             | -                              | 6                |
| MAF-49                                 | 1.728                                     | 1.696                                     | 1.020                                                                             | 11.8                           | 7                |
| Azole-Th-1                             | 4.462                                     | 3.599                                     | 1.240                                                                             | 0.78                           | 8                |
| Fe <sub>2</sub> O <sub>2</sub> (dobdc) | 3.296                                     | 2.535                                     | 1.300                                                                             | 3.76                           | 9                |
| JNU-2                                  | 4.099                                     | 3.502                                     | 1.171                                                                             | 1.63                           | 10               |
| Ni(TMBDC)(dabco) <sub>0.5</sub>        | 5.411                                     | 4.980                                     | 1.086                                                                             | 1.59                           | 11               |
| Cu(Qc) <sub>2</sub>                    | 2.681                                     | 1.133                                     | 2.365                                                                             | 3.73                           | 12               |
| MUF-15                                 | 4.374                                     | 3.758                                     | 1.164                                                                             | 1.96                           | 13               |
| IRMOF-8                                | 4.128                                     | 3.046                                     | 1.355                                                                             | 2.79                           | 14               |
| CPM-233                                | 7.395                                     | 6.465                                     | 1.144                                                                             | 1.21                           | 15               |
| ScBPDC                                 | 3.417                                     | 2.407                                     | 1.419                                                                             | 1.03                           | 16               |
| MOF-841                                | 4.656                                     | 3.442                                     | 1.353                                                                             | 1.36                           | 17               |
| ZJU-120a*                              | 4.922                                     | 3.969                                     | 1.240                                                                             | 2.96                           | 18               |
| Zn(BTFM)(DABCO) <sub>0.5</sub>         | 2.740                                     | 2.013                                     | 1.361                                                                             | 4.53                           | <b>This work</b> |
| Cu(BTFM)(DABCO) <sub>0.5</sub>         | 3.017                                     | 2.095                                     | 1.440                                                                             | 1.82                           | <b>This work</b> |

\* represents the testing temperature is 296 K.

**Table S5.** Summary of the uptake capacity for C<sub>3</sub>H<sub>8</sub> and C<sub>3</sub>H<sub>6</sub>, uptake ratio for C<sub>3</sub>H<sub>8</sub>/C<sub>3</sub>H<sub>6</sub> at 100 kPa and 298 K, and IAST selectivity at 1kPa and 298K on C<sub>3</sub>H<sub>8</sub>-selective MOFs.

| MOFs                           | C <sub>3</sub> H <sub>8</sub><br>(mmol/g) | C <sub>3</sub> H <sub>6</sub><br>(mmol/g) | Uptake ratio<br>(nC <sub>3</sub> H <sub>8</sub> /nC <sub>3</sub> H <sub>6</sub> ) | IAST<br>selectivity<br>at 1kPa | Ref.             |
|--------------------------------|-------------------------------------------|-------------------------------------------|-----------------------------------------------------------------------------------|--------------------------------|------------------|
| WOFOUR-1-Ni                    | 1.0                                       | 1.2                                       | 0.83                                                                              | 2.75                           | 19               |
| BUT-10                         | 6.2                                       | 6.5                                       | 0.95                                                                              | 1.35                           | 20               |
| Zr-BPDC                        | 8.4                                       | 8.8                                       | 0.95                                                                              | 1.48                           | 21               |
| Zr-BPYDC                       | 7.2                                       | 6.8                                       | 1.06                                                                              | 2.79                           | 21               |
| CPM-734c                       | 8.7                                       | 9.0                                       | 0.97                                                                              | 1.08                           | 22               |
| MOF-801                        | 3.2                                       | 3.5                                       | 0.91                                                                              | 1.79                           | 23               |
| Ni(ADC)(TED)                   | 2.3                                       | 2.1                                       | 1.10                                                                              | 3.5                            | 24               |
| NUM-7                          | 3.0                                       | 3.1                                       | 0.97                                                                              | 2.51                           | 25               |
| ZIF-8*                         | 4.5                                       | 4.6                                       | 0.98                                                                              | -                              | 26               |
| Zn(BTFM)(DABCO) <sub>0.5</sub> | 4.0                                       | 3.6                                       | 1.11                                                                              | 1.37                           | <b>This work</b> |
| Cu(BTFM)(DABCO) <sub>0.5</sub> | 3.7                                       | 3.6                                       | 1.03                                                                              | 1.46                           | <b>This work</b> |

\* represents the testing temperature is 293 K.

**Table S6** The calculated energies of framework and gas molecules, as well as the binding energies for Zn(BTFM)(DABCO)<sub>0.5</sub>.

|                                            | Binding energy |
|--------------------------------------------|----------------|
| E(MOF) (eV)                                | -40195.57      |
| E(C <sub>2</sub> H <sub>4</sub> ) (eV)     | -380.21        |
| E(C <sub>2</sub> H <sub>6</sub> ) (eV)     | -413.69        |
| E(C <sub>3</sub> H <sub>6</sub> ) (eV)     | -570.96        |
| E(C <sub>3</sub> H <sub>8</sub> ) (eV)     | -604.36        |
| E(MOF+C <sub>2</sub> H <sub>4</sub> ) (eV) | -40576.12      |
| E(MOF+C <sub>2</sub> H <sub>6</sub> ) (eV) | -40609.68      |
| E(MOF+C <sub>3</sub> H <sub>6</sub> ) (eV) | -40767.02      |
| E(MOF+C <sub>3</sub> H <sub>8</sub> ) (eV) | -40800.47      |
| $\Delta E(C_2H_4)$ (kJ/mol)                | -32.44         |
| $\Delta E(C_2H_6)$ (kJ/mol)                | -40.76         |
| $\Delta E(C_3H_6)$ (kJ/mol)                | -46.98         |
| $\Delta E(C_3H_8)$ (kJ/mol)                | -51.98         |



## References

- 1 A. L. Myers and J. M. Prusnitz, *AIChE J.*, 1965, **11**, 121-127.
- 2 K. S. Walton and D. S. Sholl, *AIChE J.*, 2015, **61**, 2757-2762.
- 3 J. Jagiello, T. J. Bandosz, K. Putyera and J. A., *J. Chem. Eng. Data*, 1995, **40**, 1288-1292.
- 4 J. Pires, J. Fernandes, K. Dedecker, J. R. B. Gomes, G. Pérez-Sánchez, F. Nouar, C. Serre and M. L. Pinto, *ACS Appl. Mater. Interfaces*, 2019, **11**, 27410-27421.
- 5 C. Gücüyener, J. van den Bergh, J. Gascon and F. Kapteijn, *J. Am. Chem. Soc.*, 2010, **132**, 17704-17706.
- 6 U. Böhme, B. Barth, C. Paula, A. Kuhnt, W. Schwieger, A. Mundstock, J. Caro and M. Hartmann, *Langmuir*, 2013, **29**, 8592-8600.
- 7 P.-Q. Liao, W.-X. Zhang, J.-P. Zhang and X.-M. Chen, *Nat. Commun.*, 2015, **6**, 8697-8705.
- 8 Z. Xu, X. Xiong, J. Xiong, R. Krishna, L. Li, Y. Fan, F. Luo and B. Chen, *Nat. Commun.*, 2020, **11**, 3163-3171.
- 9 L. Li, R.-B. Lin, R. Krishna, H. Li, S. Xiang, H. Wu, J. Li, W. Zhou and B. Chen, *Science*, 2018, **362**, 443-446.
- 10 H. Zeng, X.-J. Xie, M. Xie, Y.-L. Huang, D. Luo, T. Wang, Y. Zhao, W. Lu and D. Li, *J. Am. Chem. Soc.*, 2019, **141**, 20390-20396.
- 11 X. Wang, Z. Niu, A. M. Al-Enizi, A. Nafady, Y. Wu, B. Aguila, G. Verma, L. Wojtas, Y.-S. Chen, Z. Li and S. Ma, *J. Mater. Chem. A*, 2019, **7**, 13585-13590.
- 12 R. -B. Lin, H. Wu, L. Li, X. -L. Tang, Z. Li, J. Gao, H. Cui, W. Zhou and B. Chen, *J. Am. Chem. Soc.*, 2018, **140**, 12940-12946.
- 13 O. T. Qazvini, R. Babarao, Z. -L. Shi, Y. -B. Zhang and S. G. Telfer, *J. Am. Chem. Soc.*, 2019, **141**, 5014-5020.
- 14 J. Pires, M. L. Pinto and V. K. Saini, *ACS Appl. Mater. Interfaces*, 2014, **6**, 12093-12099.
- 15 H. Yang, Y. Wang, R. Krishna, X. Jia, Y. Wang, A. N. Hong, C. Dang, H. E. Castillo, X. Bu and P. Feng, *J. Am. Chem. Soc.*, 2020, **142**, 2222-2227.
- 16 S. Jiang, L. Li, L. Guo, C. Song, Q. Yang, Z. Zhang, Y. Yang, Q. Ren and Z. Bao, *Sci. China: Chem.*, 2021, **64**, 666-672.
- 17 S. Jiang, L. Guo, L. Chen, C. Song, B. Liu, Q. Yang, Z. Zhang, Y. Yang, Q. Ren and Z. Bao, *Chem. Eng. J.*, 2022, **442**, 136152.
- 18 J. Pei, J. Wang, K. Shao, Y. Yang, Y. Cui, H. Wu, W. Zhou, B. Li and G. Qian, *J. Mater. Chem. A*, 2020, **8**, 3613-3620.
- 19 L. Yang, X. Cui, Q. Ding, Q. Wang, A. Jin, L. Ge and H. Xing, *ACS Appl. Mater. Interfaces*, 2020, **12**, 2525-2530.
- 20 C. He, Y. Wang, Y. Chen, X. Wang, J. Yang, L. Li and J. Li, *Chem. Eng. J.*, 2021, **403**, 126428.
- 21 S. Wang, Y. Zhang, Y. Tang, Y. Wen, Z. Lv, S. Liu, X. Li and X. Zhou, *Chem. Eng. Sci.*, 2020, **219**, 115604.
- 22 A. Hong, H. Yang, T. Li, Y. Wang, Y. Wang, X. Jia, A. Zhou, E. Kusumoputro, J. Li, X. Bu and P. Feng, *ACS Appl. Mater. Interfaces*, 2021, **13**, 52160-52166.
- 23 P. Iacomì, F. Formalik, J. Marreiros, J. Shang, J. Rogacka, A. Mohmeyer, P. Behrens, R. Ameloot, B. Kuchta and P. L. Llewellyn, *Chem. Mater.*, 2019, **31**, 8413-8423.
- 24 M. Chang, J. Ren, Y. Wei, J. Wang, Q. Yang, D. Liu and J. F. Chen, *Sep. Purif. Technol.*,

2021, **279**, 119656.

25 S. Q. Yang, F. Z. Sun, R. Krishna, Q. Zhang, L. Zhou, Y. H. Zhang and T. L. Hu, *ACS Appl. Mater. Interfaces*, 2021, **13**, 35990-35996.

26 E. Andres-Garcia, J. López-Cabrelles, L. Oar-Arteta, B. Roldan-Martinez, M. Cano-Padilla, J. Gascon and G. M. Espallargas, *Chem. Eng. J.*, 2019, **371**, 848-856.
